# Supplementary material
Source: HighWire-hosted journal article supplement (https://embomolmed.embopress.org/content/emmm.201809288/F1)
Supplement: inline-supplementary-material-1 [file inline-supplementary-material-1.pdf]

1D

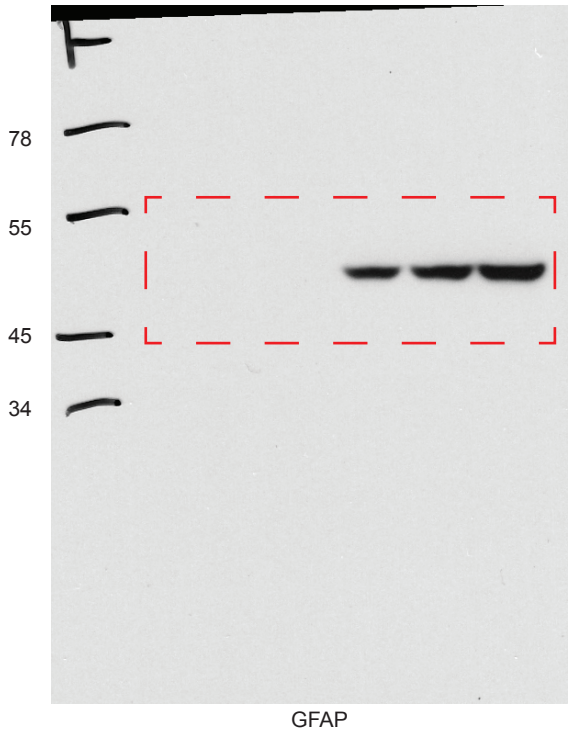

GFAP

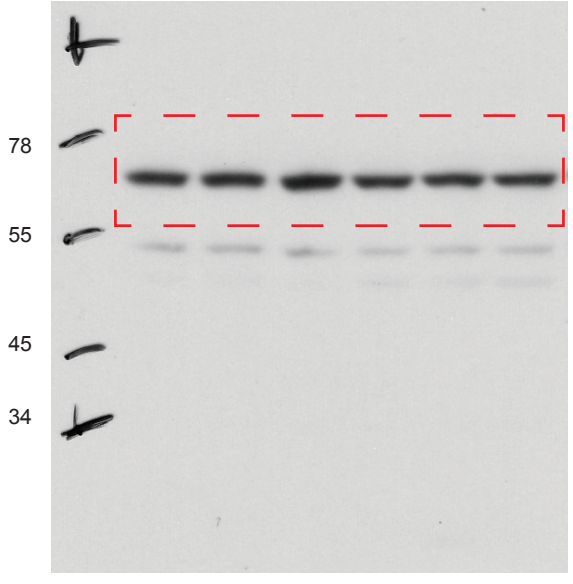

SDHA
